# Supplementary material for: The influence of maternal psychosocial circumstances and physical environment on the risk of severe wasting in rural Gambian infants: a mixed methods approach
Source: Springer Nature journal article supplement (doi:10.1186/s12889-017-4984-2), 2018-01-06
Supplement: MOESM2 [file 15347940]

**Evaluation of the Risk Factors for Malnutrition in Children  
Recruited to a Supplementation Trial in Rural Gambia**

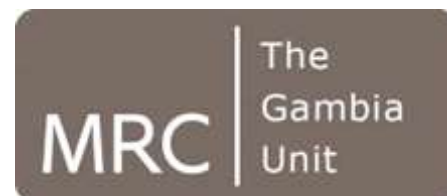

**QUESTIONNAIRE**

Version 03, 15th Sept. 2014

WestKiang No:  Date of Birth:  Study ID:

Visit date:  Fieldworker Name:

**Section 1: Demographic and Socio-economic Information**

1. Who is the child's current primary carer?

Mother [01]     Father [02]     Brother [03]     Sister [04]     Maternal Grandmother [05]  
 Paternal Grandmother [06]     Maternal Grandfather [07]     Paternal Grandfather [08]     Maternal Auntie [09]     Paternal Auntie [10]  
 Maternal Uncle [11]     Paternal Uncle [12]     Co-wife [13]     No Relation [14]     Other Relation [15]

2. Who was the child's primary carer between 0-12 months of age?

Mother [01]     Father [02]     Brother [03]     Sister [04]     Maternal Grandmother [05]  
 Paternal Grandmother [06]     Maternal Grandfather [07]     Paternal Grandfather [08]     Maternal Auntie [09]     Paternal Auntie [10]  
 Maternal Uncle [11]     Paternal Uncle [12]     Co-wife [13]     No Relation [14]     Other Relation [15]

3. Where does the child's mother live?

In household [1]     Outside of household within the Gambia [2]     Abroad [3]     Whereabouts unknown [4]     Died [5]

4. Where does the child's father live?

In household [1]     Outside of household within the Gambia [2]     Abroad [3]     Whereabouts unknown [4]     Died [5]

5. How many children younger than 5 years live in the household?

6. Are all the child's siblings alive? If not, please give the estimated age and cause of death of the deceased siblings.  Yes [1]  No [0]

|   | Age of Death | Cause of Death |
|---|--------------|----------------|
| 1 |              |                |
| 2 |              |                |
| 3 |              |                |
| 4 |              |                |
| 5 |              |                |
| 6 |              |                |

|    | Age of Death | Cause of Death |
|----|--------------|----------------|
| 7  |              |                |
| 8  |              |                |
| 9  |              |                |
| 10 |              |                |
| 11 |              |                |
| 12 |              |                |

7. What level of formal education has the primary carer had?

No formal education [1]     Arabic School [2]     Less than primary school [3]     Completed primary school [4]  
 Completed secondary school [5]     Post-secondary school [6]     Don't know [7]

8. What is the carer's main source of income?

Farming [1]     Business [2]     Salary [3]  
 Trading [4]     Remuneration from children [5]     Other, specify \_\_\_\_\_ [6]

9. Is the above income guaranteed every month?  Yes [1]  No [0]

10. How many rooms in your household are used for sleeping?

11. How many people have been sleeping regularly in your household over the past 6 months?

12. Does the mother/carer have the freedom to move around the community to access resources such as markets, shops, clinics, and companions...

- Alone [1]?  With child [2]?  with another same-aged woman [3]?  Only with a husband or elder [4]?  Never [5]?

13. Who decides what medical care to give the child?

- Mother alone [1]  Jointly with husband [2]  Jointly with mother-in-law [3]  Jointly with another person [4]  
 Mother has no say [5]

## Section 2: Infant Feeding Practices

1. Is child currently breastfed?

- No [0]  Partial breastfeeding [1]  Exclusive breastfeeding [2]

2. If no, has the child ever been breast fed?

- Yes [1]  No [0]

3. If yes, what type of breastfeeding was it?

- Partial breastfeeding [1]  Exclusive breastfeeding [2]

4. If Yes, what age was the child when breastfeeding was stopped?

|\_\_|\_\_| months

5. If No, what feeds did the child receive soon after birth?

6. At what age did you introduce complementary feeds?

|\_\_|\_\_| months

7. What complementary feeds did the child receive before 12 months of age?

8. Please list the types of food that you give to the child regularly?

|   |  |   |  |   |  |   |  |   |  |
|---|--|---|--|---|--|---|--|---|--|
| 1 |  | 2 |  | 3 |  | 4 |  | 5 |  |
|---|--|---|--|---|--|---|--|---|--|

9. Who decides what food to feed the child?

- Mother alone [1]  Jointly with husband [2]  
 Jointly with mother-in-law [3]  Jointly with another person [4]  
 Mother has no say [5]

10. Who feeds the child most of the time?

- Mother [01]  Father [02]  Brother [03]  Sister [04]  Maternal Grandmother [05]  
 Paternal Grandmother [06]  Maternal Grandfather [07]  Paternal Grandfather [08]  Maternal Auntie [09]  Paternal Auntie [10]  
 Maternal Uncle [11]  Paternal Uncle [12]  Co-wife [13]  No Relation [14]  Other Relation [15]

11. What do you use to feed the child?

- Hand [1]  Spoon [2]  Other, please specify \_\_\_\_\_ [3]

12. How many times a day is the child fed on complementary feeds?

|\_\_|\_\_|

13. Regarding feeding times for the child:

- Scheduled [1]  Fed when hungry [2]

14. How do you assess to see whether the child is hungry?

15. How do you assess to see whether the child is full?

16. At most feeding times:

- Own bowl [1]  Share with other children [2]  Share with adults [3]

## Section 3: Water, Sanitation and Hygiene

1. Over the past 6 months, what was the main source of water for the members of your household

- Piped into house [1]  Covered well in house or compound [2]  Piped into yard [3]  Covered public well [4]  
 Public tap [5]  Open public well River or stream [6]  Open well in house or yard [7]  Deep tube well [8]  
 Rainwater [9]  Shallow tube well [10]  Bought (tank, bottles, etc) [11]  Borehole [12]  
 Other, please specify \_\_\_\_\_ [13]

2. How long does it take to go there, get water, and come back?

- Less than 15 minutes [1]  15 - 29 minutes [2]  30 - 59 minutes [3]  1 - 3 hours [4]  More than 3 hours [5]

3. Do you or other members from your household go and fetch drinking water for the household every day?

Yes [1]  No [0]

4. If yes, on average, how many trips do you and members from your household make to fetch water each day? |\_\_|\_\_|

5. Do you usually treat drinking water at home?

Yes [1]  No [0]

6. If yes, which method do you use the most to treat drinking water at home? (Tick all that applies)

Leave water in sun to disinfect [1]  Boil [2]  Filter through a cloth [3]  Filter through ceramic or other filter [4]  
 Chlorine liquid, powder, or tablets Alum [5]  Other chemical or additive, specify\_\_\_\_\_ [6]

7. If you use chlorine liquid, powder or tablets, which type do you most commonly use? (Tick only one)

Certeza [1]  Watermaker [2]  Aquatabs PurR [3]  AquaGuard [4]  WaterGuard [5]  Don't know [6]  
 Other chemical or additive, specify\_\_\_\_\_ [7]

8. What kind of facility does your household most commonly use to dispose off human fecal waste?  
[Show pictures to confirm the identity of the facility used.]

Flush toilet [1]  Pour flush toilet [2]  Ventilated improved pit (VIP) latrine [3]  Traditional pit toilet [4]  Bush [5]  
 Field [6]  Ground [7]  Stream [8]  No facility [9]  Other, specify\_\_\_\_\_ [10]

9. When do you usually wash your hands? [Tick all that applies. Do not probe.]

Before eating [1]  After handling domestic animals [2]  Before cooking [3]  After cleaning child who defecated [4]  
 Before you nurse or prepare baby's food [5]  After you defecate [6]  Never [7]  Other, specify\_\_\_\_\_ [8]

10. When you wash your hands, what do you usually use? [tick only one]

Water only [1]  Water and soap [2]  Water and ashes [3]  Water and mud or clay [4]  
 Other, please specify\_\_\_\_\_ [5]
