# Supplementary material for: The influence of maternal psychosocial circumstances and physical environment on the risk of severe wasting in rural Gambian infants: a mixed methods approach
Source: Springer Nature journal article supplement (doi:10.1186/s12889-017-4984-2), 2018-01-06
Supplement: MOESM3 [file 15347940]

**Evaluation of the Risk Factors for Malnutrition in Children Recruited to a Supplementation Trial in Rural**

**Modified Edinburgh Depression Scale**

Version 01, 23rd June

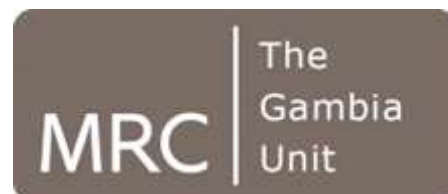

WestKiang No:

Study ID:

Visit Date:

Completed by:

We would like to know something about how you feel in your day-to-day life. Please answer each question

***N'lafita alonna nying tiliwoorowulo kono e'kee e'fan jee n'yadiile***

**Questions and filters**

**Coding Categories**

- |                                                                                                                                                                                   |                                                                                                                                                                                                                                    |                      |
|-----------------------------------------------------------------------------------------------------------------------------------------------------------------------------------|------------------------------------------------------------------------------------------------------------------------------------------------------------------------------------------------------------------------------------|----------------------|
| <p>1. Have you been able to laugh and see the funny side of things?<br/><b><i>Nying tiliwoorowulo kono e'ka meng jee a'kee e'jelendi le ban?</i></b></p>                          | <p>As much as you always could [0]<br/>Not quite so much as you used to [1]<br/>Definitely not so much as you used to [2]<br/>Not at all [3]</p>                                                                                   | <input type="text"/> |
| <p>2. Have you looked forward with enjoyment to things<br/><b><i>Nying tiliwoorowulo kono e'ka meng jee e'ka diyaa yea le ban</i></b></p>                                         | <p>As much as you used to [0]<br/>A bit less than you used to [1]<br/>Definitely less than you used to [2]<br/>Hardly at all [3]</p>                                                                                               | <input type="text"/> |
| <p>3. Have you blamed yourself unnecessarily when things went wrong?<br/><b><i>Nying tiliwoorowulo kono e'ka efang jalailay ban niing yea kukee meng mang nyang</i></b></p>       | <p>Yes, most of the time [3]<br/>Yes, some of the time [2]<br/>Not very often [1]<br/>Not at all [0]</p>                                                                                                                           | <input type="text"/> |
| <p>4. Have you been anxious or worried for no good reason<br/><b><i>Nying tiliwoorowulo kono e'ka efang jalailay ban niing yea kukee meng mang nyang</i></b></p>                  | <p>No, not all [0]<br/>Hardly ever [1]<br/>Yes, sometimes [2]<br/>Yes, very often [3]</p>                                                                                                                                          | <input type="text"/> |
| <p>5. Have you felt scared or panicked for no good reason?<br/><b><i>Nying tiliwoorowulo kono e'ka siila le ban walla foo e'kijoo ke e'faraa asaataree daalila taala.</i></b></p> | <p>Yes, quiet a lot [3]<br/>Yes, sometimes [2]<br/>No, not much [1]<br/>No, not at all [0]</p>                                                                                                                                     | <input type="text"/> |
| <p>6. Have you been coping with your daily routine?<br/><b><i>Nying tiliwoorowulo kono e'ka sawaree e'lla kowoolo kela le ban.</i></b></p>                                        | <p>Yes, I have been coping as well as ever [0]<br/>Yes, most of the times I have coped quite well [1]<br/>No, sometimes I have not coped as well as usual [2]<br/>No, most of the time I have not been able to cope at all [3]</p> | <input type="text"/> |
| <p>7. Have you had difficulty sleeping?<br/><b><i>Nying tiliwoorowulo kono seenoo ka koleeya e'maa le ban.</i></b></p>                                                            | <p>Yes, most of the time [3]<br/>Yes, quiet often [2]<br/>Not very often [1]<br/>No, not at all [0]</p>                                                                                                                            | <input type="text"/> |
| <p>8. Have you felt sad?<br/><b><i>Nying tiliwoorowulo kono yea niikuya soto le ba</i></b></p>                                                                                    | <p>Yes, most of the time [3]<br/>Yes, quiet often [2]<br/>Not very often [1]<br/>No, not at all [0]</p>                                                                                                                            | <input type="text"/> |
| <p>9. Have you been so unhappy that you have been crying?<br/><b><i>Nying tiliwoorowulo kono yea niikuya soto le ban, foo e'ka kunboo.</i></b></p>                                | <p>Yes, most of the time [3]<br/>Yes, quiet often [2]<br/>Not very often [1]<br/>No, never [0]</p>                                                                                                                                 | <input type="text"/> |
| <p>10. Do you like to be by yourself?<br/><b><i>Nying tiliwoorowulo kono e'ka laafii taree la e'fang maa le ban.</i></b></p>                                                      | <p>Yes, most of the time [3]<br/>Yes, quiet often [2]<br/>Not very often [1]<br/>Not at all [0]</p>                                                                                                                                | <input type="text"/> |

**Total Score:**
